# Supplementary material for: RNAi drives nonreciprocal translocations at eroding chromosome ends to establish telomere-free linear chromosomes
Source: PubMed Central journal article supplement — Genes Dev. 2018 Apr 1;32(7-8):537–54. doi: 10.1101/gad.311712.118 (PMC5959237; doi:10.1101/gad.311712.118), 2018-04-01
Supplement: supp_gad.311712.118_Supplemental_Fig_S1.pdf [file supp_gad.311712.118_Supplemental_Fig_S1.pdf]

A)

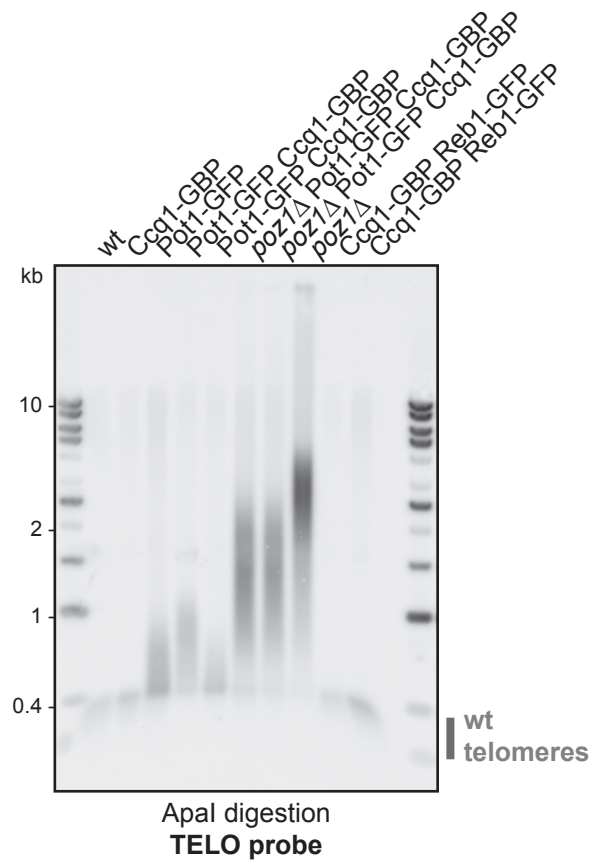

B)

**COMPETITIVE GROWTH**

|                          | n  | L    | O   | HAATI <sup>rDNA</sup> | HAATI <sup>STE</sup> |
|--------------------------|----|------|-----|-----------------------|----------------------|
| <i>trt1Δ</i>             | 10 | 0%   | 0%  | 100%                  | 0%                   |
| <i>tazΔ trt1Δ</i>        | 10 | 100% | 0%  | 0%                    | 0%                   |
| <i>poz1Δ trt1Δ</i>       | 10 | 10%  | 90% | 0%                    | 0%                   |
| <i>poz1-W209A trt1Δ</i>  | 10 | 0%   | 0%  | 100%                  | 0%                   |
| <i>poz1Δ dcr1Δ trt1Δ</i> | 10 | 0%   | 90% | 0%                    | 10%                  |

C)

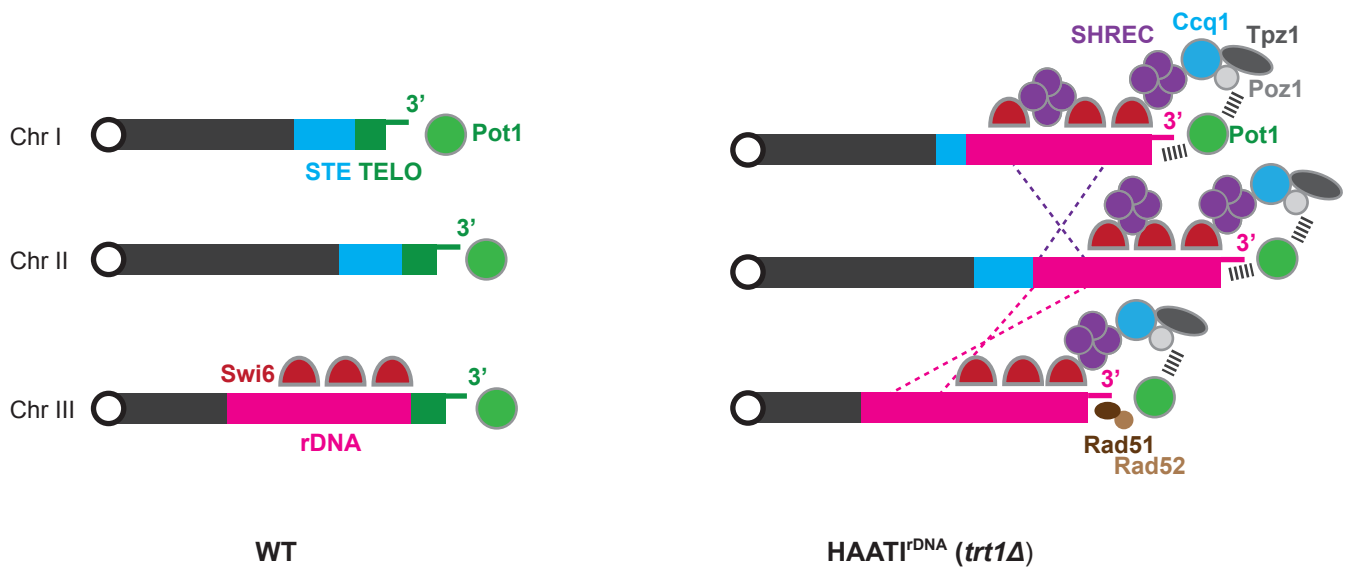

**SUPPLEMENTAL FIGURE S1. Telomere length in cells harbouring Shelterin components artificially tethered to rDNA or each other**

- A) Genomic DNA extracted from the indicated strains was digested with *Apal*, which cuts just inside the telomeres of Chr I and II, and analyzed by Southern blotting with a TELO probe derived from *Apal* digestion of pNSU70 (see Materials and Methods).
- B) The *poz1-W209A* mutation does not prevent HAATI formation. Distribution of survivor types arising from the indicated genotypes under competitive growth conditions. 'n' indicates number of populations analysed per each genomic background. HAATI formation was scored as described in Figure 1.
- C) Schematic representing mechanisms of Pot1 recruitment in WT and HAATI<sup>rDNA</sup>. In WT cells, Pot1 is recruited by the ds telomere binding proteins as well as the ss telomeric overhang. In HAATI<sup>rDNA</sup>, the rDNA sequences associate with SHREC, which binds Ccq1, which binds Tpz1 and Poz1, in turn concentrating Pot1 at the rDNA terminus. Simultaneously, local Rad51-mediated processes facilitate the handover of replication stalling-induced ss rDNA to the locally concentrated Pot1.
