# Supplementary material for: RNAi drives nonreciprocal translocations at eroding chromosome ends to establish telomere-free linear chromosomes
Source: PubMed Central journal article supplement — Genes Dev. 2018 Apr 1;32(7-8):537–54. doi: 10.1101/gad.311712.118 (PMC5959237; doi:10.1101/gad.311712.118), 2018-04-01
Supplement: supp_gad.311712.118_Supplemental_Fig_S2.pdf [file supp_gad.311712.118_Supplemental_Fig_S2.pdf]

A)

| COMPETITIVE GROWTH     |    |    |     |                       |                      |
|------------------------|----|----|-----|-----------------------|----------------------|
|                        | n  | L  | O   | HAATI <sup>rDNA</sup> | HAATI <sup>STE</sup> |
| <i>trt1Δ</i>           | 10 | 0% | 0%  | 100%                  | 0%                   |
| <i>dcr1Δ trt1Δ</i>     | 10 | 0% | 70% | 0%                    | 30%                  |
|                        | 10 | 0% | 90% | 0%                    | 10%                  |
| <i>dcr1-ΔCTD trt1Δ</i> | 10 | 0% | 90% | 0%                    | 10%                  |
| <i>dcr1-cd trt1Δ</i>   | 10 | 0% | 90% | 0%                    | 10%                  |

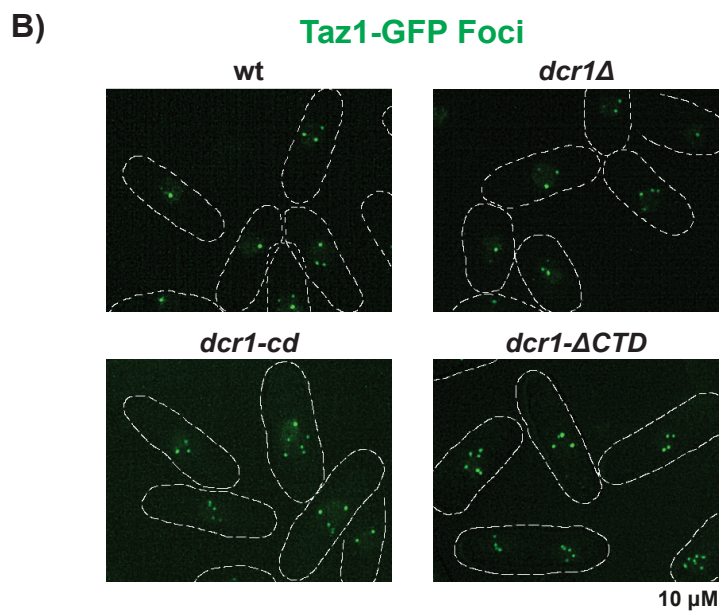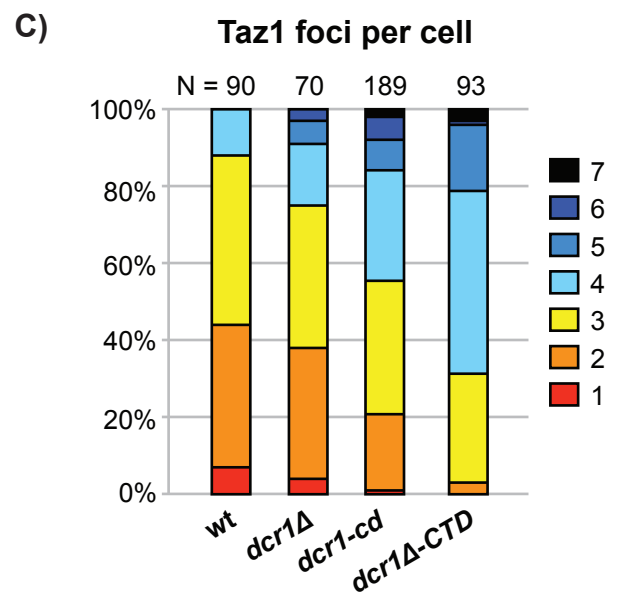

**SUPPLEMENTAL FIGURE S2. Catalytically active Dcr1 is required for its roles in HAATI regulation**

- A) Analysis of survival, as described in Figure 1, in the indicated genetic backgrounds under competitive conditions. 'n' indicates the number of independent populations raised.
- B) Representative examples of WT, *dcr1* $\Delta$ , *dcr1-cd* and *dcr1- $\Delta$ CTD* cells harboring GFP- or mCherry-tagged Taz1 (shown in green). Cultures were imaged using identical exposure conditions for all cell types; images were deconvolved and Z stacks projected into a single image.
- C) Percentage distribution of cells harbouring the indicated number of Taz1 foci according to the relative genotype. N = the number of cells imaged for each genotype. The few cells showing 7 telomere foci are likely victims of the chromosome missegregation seen occasionally in the absence of Dicer function.
