# Supplementary material for: RNAi drives nonreciprocal translocations at eroding chromosome ends to establish telomere-free linear chromosomes
Source: PubMed Central journal article supplement — Genes Dev. 2018 Apr 1;32(7-8):537–54. doi: 10.1101/gad.311712.118 (PMC5959237; doi:10.1101/gad.311712.118), 2018-04-01
Supplement: supp_gad.311712.118_Supplemental_Fig_S3.pdf [file supp_gad.311712.118_Supplemental_Fig_S3.pdf]

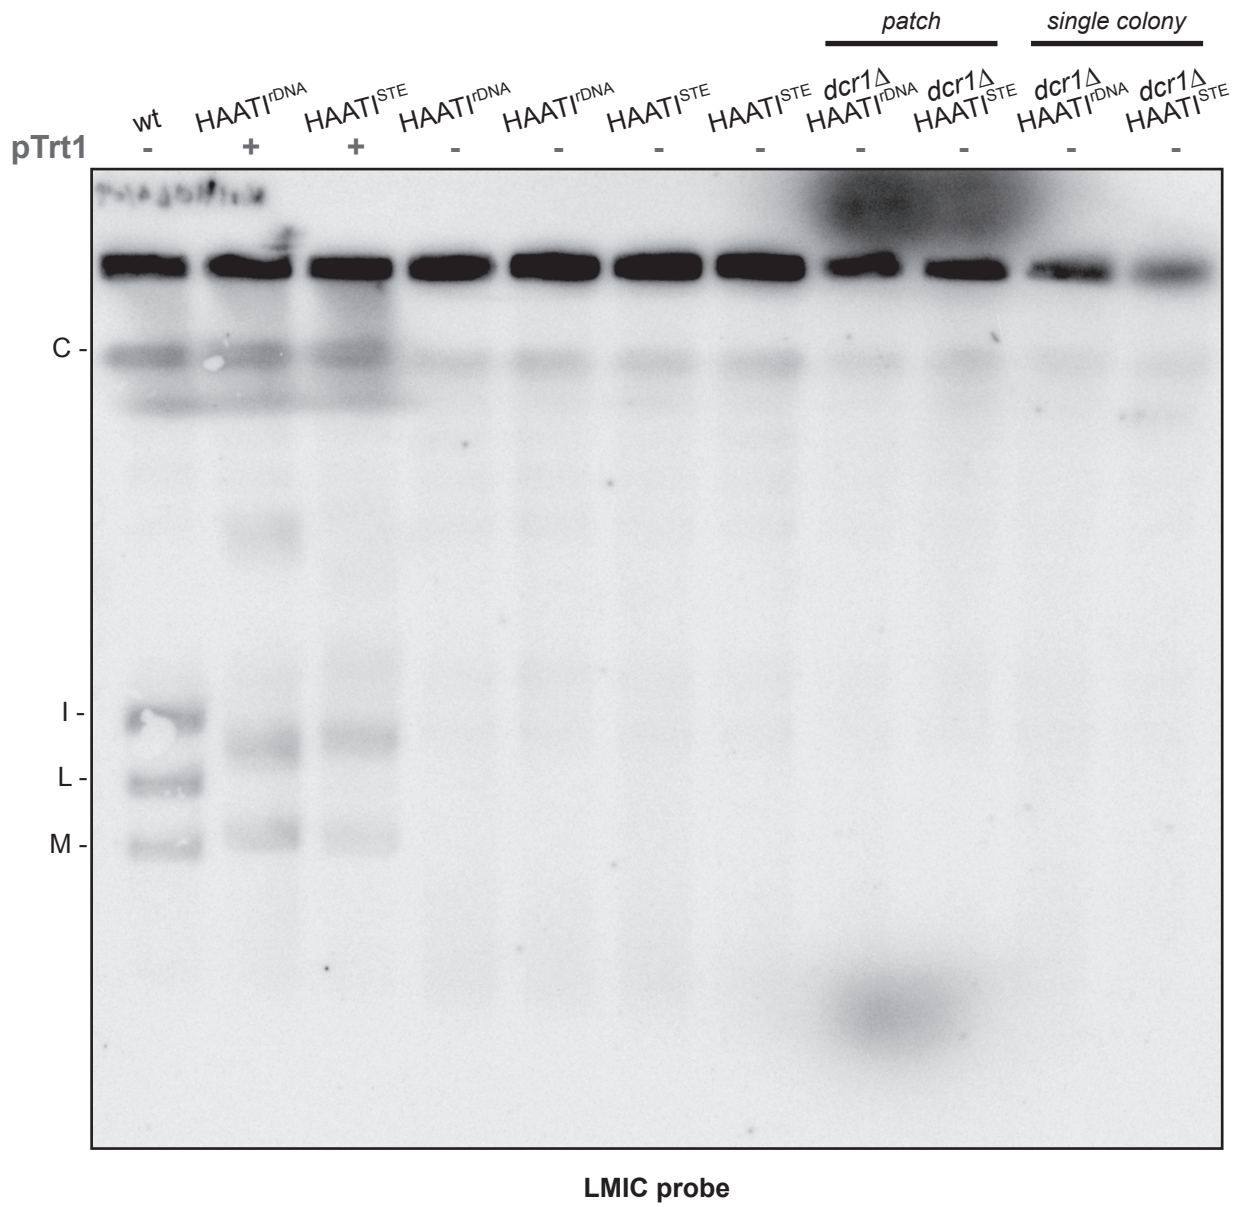

**SUPPLEMENTAL FIGURE S3. Dicer is dispensable for re-establishment of HAATI<sup>rDNA</sup> when each chromosome has already acquired rDNA**

The gain and loss of telomeres in the strains analyzed in Figure 5B is further monitored. PFGE analysis of NotI digested chromosomes from WT and HAATI+Trt1 strains before and after telomerase removal, probed with LMIC probes. *trt1*Δ HAATI+Trt1 progeny were raised either in competitive (patch) or non-competitive (single colony) growth conditions. Note that chromosome sizes differ between WT and HAATI+Trt1 cells, as the latter retain large tracts of rDNA just proximal to all telomeres.
