# Supplementary material for: RNAi drives nonreciprocal translocations at eroding chromosome ends to establish telomere-free linear chromosomes
Source: PubMed Central journal article supplement — Genes Dev. 2018 Apr 1;32(7-8):537–54. doi: 10.1101/gad.311712.118 (PMC5959237; doi:10.1101/gad.311712.118), 2018-04-01
Supplement: supp_gad.311712.118_Supplemental_Fig_S4.pdf [file supp_gad.311712.118_Supplemental_Fig_S4.pdf]

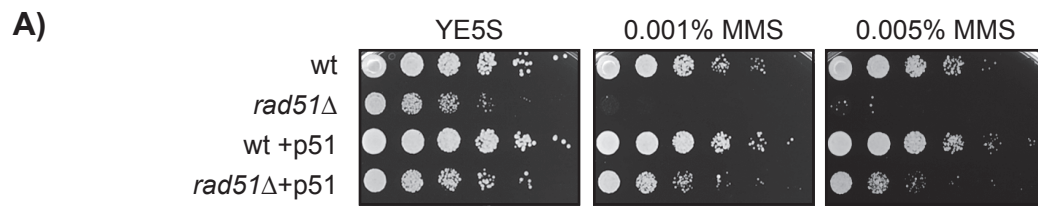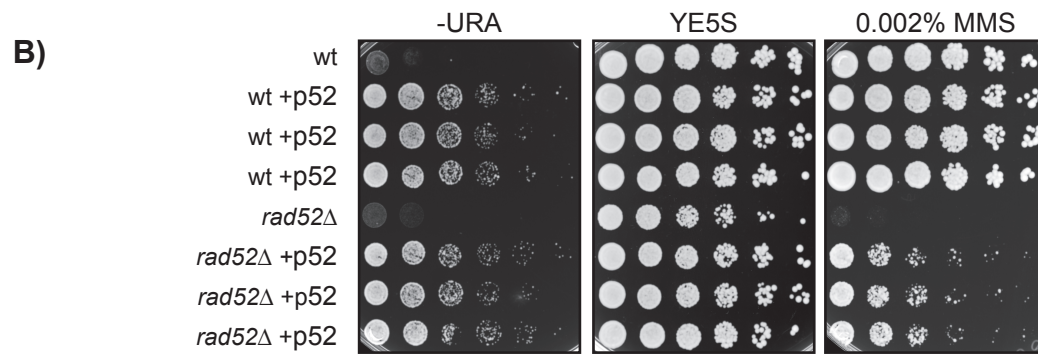

**SUPPLEMENTAL FIGURE S4. Inducible system (used in Figure 5E-F) to study roles of Rad51 and Rad52 in HAATI maintenance**

- A) Addition of plasmid pRAD51 ('+p51'), which harbors *rad51*<sup>+</sup> as well as a *ura4*<sup>+</sup> selectable marker, rescues MMS sensitivity of *rad51*Δ mutants. 5-fold serial dilutions of cultures are shown.
- B) Addition of plasmid pRAD52 ('+p52') rescues MMS sensitivity of *rad52*Δ mutants.
