# Supplementary material for: RNAi drives nonreciprocal translocations at eroding chromosome ends to establish telomere-free linear chromosomes
Source: PubMed Central journal article supplement — Genes Dev. 2018 Apr 1;32(7-8):537–54. doi: 10.1101/gad.311712.118 (PMC5959237; doi:10.1101/gad.311712.118), 2018-04-01
Supplement: supp_gad.311712.118_Supplemental_Table_S1.pdf [file supp_gad.311712.118_Supplemental_Table_S1.pdf]

## SUPPLEMENTAL TABLES

Table S1

| Strains                                                                                   | Origin     | JCF Number    |
|-------------------------------------------------------------------------------------------|------------|---------------|
| <i>ade6-M210 dcr1::hygMX6</i>                                                             | This study | JCF 10501     |
| <i>ade6-M210 ago1::kanMX6</i>                                                             | This study | JCF 10503     |
| <i>circular trt1::his3 leu1-32 his3-D1 ura4-D18 ade6-M210 pot1::hygMX6</i>                | This study | JCF 10509     |
| <i>trt1+/trt1::his dcr1+/-::hygMX6</i>                                                    | This study | JCF 10513     |
| <i>trt1+/trt1::natMX6</i>                                                                 | This study | JCF 10516     |
| <i>trt1+/trt1::natMRX6 dcr1+/-::hygMX6</i>                                                | This study | JCF 10518     |
| <i>trt1+/trt1::natMRX6 ago1+/-::kanMX6</i>                                                | This study | JCF 10520     |
| <i>circular trt1::his3 leu1-32 his3-D1 ura4-D18 ade6-M210 dcr1::hygMX6</i>                | This study | JCF 10521     |
| <i>ade6-M210 his3-D1 leu1-32 ura4-D18 trt1::his3 dcr1::hygMX6</i>                         | This study | JCF 10522     |
| <i>trt1::his3 ura4+ dcr1::hygMX6</i>                                                      | This study | JCF 10524     |
| <i>ade6-M210 his3-D1 leu1-32 ura4-D18 trt1::his3 ago1::hygMX6</i>                         | This study | JCF JCF 10525 |
| <i>ade6-M210 his3-D1 leu1-32 ura4-D18 trt1::his3 rdp1::hygMX6</i>                         | This study | JCF 10527     |
| <i>ade6-M210 his3-D1 leu1-32 ura4-D18 trt1::his3 rdp1::hygMX6</i>                         | This study | JCF 10528     |
| <i>ade6-M210 his3-D1 leu1-32 ura4-D18</i>                                                 | This study | JCF 10530     |
| <i>ade6-M210 his3-D1 leu1-32 ura4-D18 trt1::his3</i>                                      | This study | JCF 10531     |
| <i>ade6-M210 his3-D1 leu1-32 ura4-D18 trt1::his3 ago1::hygMX6</i>                         | This study | JCF 10532     |
| <i>ade6-M210 his3-D1 leu1-32 ura4-D18 trt1::his3 ago1::hygMX6 dcr1::natMX6</i>            | This study | JCF 10540     |
| <i>trt1::his3 ura4+ clr3::natMX6</i>                                                      | This study | JCF 10541     |
| <i>ade6-M210 his3-D1 leu1-32 ura4-D18 trt1::his3 clr3::natMX6</i>                         | This study | JCF 10543     |
| <i>ade6-M210 dcr1::hygMX6 clr3::natMX6</i>                                                | This study | JCF 10548     |
| <i>ade6-M210 his3-D1 leu1-32 ura4-D18 clr3::kanMX6</i>                                    | This study | JCF 10550     |
| <i>ade6-M210 his3-D1 leu1-32 ura4-D18 +URA4 plasmid</i>                                   | This study | JCF 10552     |
| <i>ade6-M210 his3-D1 leu1-32 ura4-D18 +rad51 URA4 plasmid</i>                             | This study | JCF 10553     |
| <i>ura4-D18 rad51::kanMX6 +rad51 URA4 plasmid</i>                                         | This study | JCF 10555     |
| <i>ade6-M210 his3-D1 leu1-32 ura4-D18 trt1::his3 +rad51 URA4 plasmid</i>                  | This study | JCF 10557     |
| <i>ade6-M210 his3-D1 leu1-32 ura4-D18 trt1::his3 rad51::kanMX6 +rad51 URA4 plasmid</i>    | This study | JCF 10559     |
| <i>ade6-M210 his3-D1 leu1-32 ura4-D18 trt1::hygMX6 +rad51 URA4 plasmid (cDNA plasmid)</i> | This study | JCF 10561     |

|                                                                                                         |            |           |
|---------------------------------------------------------------------------------------------------------|------------|-----------|
| <i>ade6-M210 his3-D1 leu1-32 ura4-D18 trt1::hygMX6 rad51::kanMX6 +rad51 URA4 plasmid (cDNA plasmid)</i> | This study | JCF 10563 |
| <i>ade6-M210 his3-D1 leu1-32 ura4-D18 trt1::his3 dcr1::hygMX6 clr3::natMX6</i>                          | This study | JCF 10565 |
| <i>dcr1::hygMX6 taz1-GFP-kan</i>                                                                        | This study | JCF 10570 |
| <i>leu1-32 ura4-D18 ori1 ade6-216 imr1R(Nco1)::ura4+ dcr1-ΔC33::nat</i>                                 | This study | JCF 10575 |
| <i>leu1-32 ura4-D18 ori1 ade6-216 imr1R(Nco1)::ura4+ Dcr1, D937A, D1127A-TAP-kan</i>                    | This study | JCF 10576 |
| <i>trt1+/trt1::natMX6 rdp1::hygMX6</i>                                                                  | This study | JCF 10577 |
| <i>ade6-M210 his3-D1 leu1-32 ura4-D18 trt1::his3 rdp1::hygMX6</i>                                       | This study | JCF 10578 |
| <i>trt1::his3 ura4+ rad52::natMX6</i>                                                                   | This study | JCF 10590 |
| <i>trt1::his3 ura4+ rdp1::hygMX6</i>                                                                    | This study | JCF 10597 |
| <i>ade6-M210 his3-D1 leu1-32 ura4-D18 trt1::his3 rdp1::hygMX6</i>                                       | This study | JCF 10598 |
| <i>dcr1::hygMX6 taz1-mCherry:natMX6</i>                                                                 | This study | JCF 10599 |
| <i>dcr1, D937A, D1127A-TAP-kan ade6-M216 taz1-mCherry:natMX6</i>                                        | This study | JCF 10603 |
| <i>dcr1-ΔC33::nat taz1-GFP-kan</i>                                                                      | This study | JCF 10606 |
| <i>ade6-M210 rdp1::hygMX6</i>                                                                           | This study | JCF 10611 |
| <i>ade6-M210 his3-D1 leu1-32 ura4-D18 poz1::kanMX6</i>                                                  | This study | JCF 10624 |
| <i>trt1+/trt1::natMRX6 dcr1+/-::hygMX6 poz1+/-::kanMX6</i>                                              | This study | JCF 10628 |
| <i>ade6-M210 his3-D1 leu1-32 ura4-D18 +rad52-URA4 plasmid (cDNA plasmid)</i>                            | This study | JCF 10632 |
| <i>rad52::leu2 ade-6 leu1-32 ura4-D18 his1- +rad52-URA4 plasmid (cDNA plasmid)</i>                      | This study | JCF 10634 |
| <i>trt1::his3 ura4+ rdp1::hygMX6</i>                                                                    | This study | JCF 10636 |
| <i>trt1::his3 ura4+ dcr1::natMX6</i>                                                                    | This study | JCF 10637 |
| <i>ade6-M210 his3-D1 leu1-32 ura4-D18 trt1::hygMX6 +rad52-URA4 plasmid (cDNA plasmid)</i>               | This study | JCF 10638 |
| <i>ade6-M210 his3-D1 leu1-32 ura4-D18 trt1::hygMX6 clr3::natMX6</i>                                     | This study | JCF 10639 |
| <i>ade6-M210 his3-D1 leu1-32 ura4-D18 trt1::his3 +rad52-URA4 plasmid (cDNA plasmid)</i>                 | This study | JCF 10640 |
| <i>ade6-M210 his3-D1 leu1-32 ura4-D18 trt1::his3 rad52::natMX6 +rad52-URA4 plasmid (cDNA plasmid)</i>   | This study | JCF 10644 |
| <i>ade6-M210 his3-D1 leu1-32 ura4-D18 trt1::his3 rad52::leu2 +rad52-URA4 plasmid (cDNA plasmid)</i>     | This study | JCF 10645 |
| <i>ade6-M210 his3-D1 leu1-32 ura4-D18 trt1::hygMX6 rad52::natMX6 +rad52-URA4 plasmid (cDNA plasmid)</i> | This study | JCF 10646 |
| <i>trt1::his3 dcr1::hygMX +pkanMX-trt1+</i>                                                             | This study | JCF 10648 |
| <i>ade6-M210 his3-D1 leu1-32 ura4-D18 pot1-GFP-kanMX</i>                                                | This study | JCF 10650 |

|                                                                                                   |            |           |
|---------------------------------------------------------------------------------------------------|------------|-----------|
| <i>ade6-M210 dcr1::hygMX6 trt1::natMX6</i>                                                        | This study | JCF 10674 |
| <i>ade6-M210 dcr1::hygMX6 trt1::natMX6</i>                                                        | This study | JCF 10675 |
| <i>ade6-M210 dcr1::hygMX6 trt1::natMX6</i>                                                        | This study | JCF 10676 |
| <i>ade6-M210 dcr1::hygMX6 trt1::natMX6</i>                                                        | This study | JCF 10677 |
| <i>ade6-M210 dcr1::hygMX6 trt1::natMX6</i>                                                        | This study | JCF 10678 |
| <i>ade6-M210 dcr1::hygMX6 trt1::natMX6</i>                                                        | This study | JCF 10679 |
| <i>ade6-M210 ago1::hygMX6 trt1::natMX6</i>                                                        | This study | JCF 10682 |
| <i>trt1::natMRX6 dcr1::hygMX6</i>                                                                 | This study | JCF 10683 |
| <i>ade6-M210 his3-D1 leu1-32 ura4-D18 trt1::his3 ago1::hygMX6 dcr1::natMX6</i>                    | This study | JCF 10684 |
| <i>ade6-M210 his3-D1 leu1-32 ura4-D18 rdp1::hygMX6 trt1::natMX6</i>                               | This study | JCF 10685 |
| <i>ade6-M210 his3-D1 leu1-32 ura4-D18 rdp1::hygMX6 trt1::natMX6</i>                               | This study | JCF 10686 |
| <i>leu1-32 ura4-D18 ori1 ade6-216 imr1R(Nco1)::ura4+ dcr1-ΔC33::nat trt1::hygMX6</i>              | This study | JCF 10687 |
| <i>leu1-32 ura4-D18 ori1 ade6-216 imr1R(Nco1)::ura4+ dcr1-ΔC33::nat trt1::hygMX6</i>              | This study | JCF 10688 |
| <i>leu1-32 ura4-D18 ori1 ade6-216 imr1R(Nco1)::ura4+ Dcr1, D937A, D1127A-TAP-kan trt1::natMX6</i> | This study | JCF 10689 |
| <i>leu1-32 ura4-D18 ori1 ade6-216 imr1R(Nco1)::ura4+ Dcr1, D937A, D1127A-TAP-kan trt1::natMX6</i> | This study | JCF 10690 |
| <i>ade6-M210 dcr1::hygMX6 trt1::natMX6 clr3::kanMX6</i>                                           | This study | JCF 10693 |
| <i>ade6-M210 dcr1::hygMX6 trt1::natMX6 +pkanMX-trt1</i>                                           | This study | JCF 13001 |
| <i>ade6-M210 ago1::hygMX6 trt1::natMX6 +pkanMX-trt1</i>                                           | This study | JCF 13003 |
| <i>ade6-M210 his3-D1 leu1-32 ura4-D18 trt1::his3 ago1::hygMX6 dcr1::natMX6 +pkanMX-trt1</i>       | This study | JCF 13004 |
| <i>trt1::his3 ura4+ dcr1::hygMX6 +pkanMX-trt1</i>                                                 | This study | JCF 13006 |
| <i>ade6-M210 his3-D1 leu1-32 ura4-D18 tpz1::kanMX6</i>                                            | This study | JCF 13010 |
| <i>circular trt1::his3 leu1-32 his3-D1 ura4-D18 ade6-M210 tpz1::kanMX6</i>                        | This study | JCF 13011 |
| <i>ade6-M210 his3-D1 leu1-32 ura4-D18 trt1::his3 tpz1::kanMX6</i>                                 | This study | JCF 13016 |
| <i>ade6-M210 his3-D1 leu1-32 ura4-D18 trt1::his3 tpz1::kanMX6</i>                                 | This study | JCF 13020 |
| <i>trt1::natMRX6 poz1::kanMX6</i>                                                                 | This study | JCF 13023 |
| <i>trt1::his3 ura4+ tpz1::kanMX6</i>                                                              | This study | JCF 13045 |
| <i>leu1-32 ade6-210 poz1-W209A-13myc::kanMX6</i>                                                  | This study | JCF 13056 |
| <i>leu1-32 ade6-210 poz1-W209A-13myc::kanMX6</i>                                                  | This study | JCF 13057 |
| <i>ade6-M210 his3-D1 leu1-32 ura4-D18 trt1::his3 poz1-W209A-13myc::kanMX6</i>                     | This study | JCF 13058 |
| <i>ade6-M210 his3-D1 leu1-32 ura4-D18 trt1::his3 poz1-W209A-13myc::kanMX6</i>                     | This study | JCF 13062 |

|                                                                                                                                                     |            |           |
|-----------------------------------------------------------------------------------------------------------------------------------------------------|------------|-----------|
| <i>ade6-M210 his3-D1 leu1-32 ura4-D18 poz1-W209A-13myc::kanMX6</i>                                                                                  | This study | JCF 13063 |
| <i>ade6-M210/ade6-M216 his3-D1/his3-D1 leu1-32/leu1-32 ura4-D18/ura4-D18</i>                                                                        | This study | JCF 13067 |
| <i>ade6-M210 dcr1::hygMX6 trt1::natMX6 poz1-W209A-13myc::kanMX6</i>                                                                                 | This study | JCF 13072 |
| <i>ade6-M210 dcr1::hygMX6 trt1::natMX6 poz1-W209A-13myc::kanMX6</i>                                                                                 | This study | JCF 13078 |
| <i>ade6-M216/ade6-M210 his+/his3-D1 leu1+/leu1-32 ura+/ura4-D18 dcr1+/dcr1::hygMX6</i>                                                              | This study | JCF 13088 |
| <i>ade6-M210 his3-D1 leu1-32 ura4-D18 poz1::natMX6</i>                                                                                              | This study | JCF 13093 |
| <i>ade6-M216/ade6-M210 his+/his3-D1 leu1+/leu1-32 ura+/ura4-D18 dcr1+/dcr1::hygMX6 trt1+/trt1::natMX6</i>                                           | This study | JCF 13098 |
| <i>ade6-M210 his3-D1 leu1-32 ura4-D18 ccq1-mCherry-GBP:hygMX6</i>                                                                                   | This study | JCF 13113 |
| <i>ade6-M210/ade6-M216 his3-D1/his3-D1 leu1-32/leu1-32 ura4-D18/ura4-D18 ccq1+/ccq1-mCherry-GBP:hygMX6</i>                                          | This study | JCF 13114 |
| <i>ade6-M210 his3-D1 leu1-32 ura4-D18 pot1-GFP-kanMX ccq1-mCherry-GBP:hygMX6</i>                                                                    | This study | JCF 13115 |
| <i>ade6-M210/ade6-M216 his3-D1/his3-D1 leu1-32/leu1-32 ura4-D18/ura4-D18 pot1+/pot1-GFP-kanMX6 ccq1+/ccq1-mCherry-GBP:hygMX6</i>                    | This study | JCF 13118 |
| <i>Reb1-GFP:natMX6 Hht1-RFP:kanMX6</i>                                                                                                              | This study | JCF 13120 |
| <i>ade6-M210 his3-D1 leu1-32 ura4-D18 trt1::his3 Reb1-GFP:natMX6 Hht1-RFP:kanMX6</i>                                                                | This study | JCF 13121 |
| <i>Reb1-GFP:natMX6 Hht1-RFP:kanMX6 dcr1::hygMX6</i>                                                                                                 | This study | JCF 13122 |
| <i>ade6-M210 his3-D1 leu1-32 ura4-D18 trt1::his3 ccq1-mCherry-GBP:hygMX6</i>                                                                        | This study | JCF 13123 |
| <i>ade6-M210/ade6-M216 his3-D1/his3-D1 leu1-32/leu1-32 ura4-D18/ura4-D18 tpz1/tpz1::natMX6</i>                                                      | This study | JCF 13128 |
| <i>ade6-M210 his3-D1 leu1-32 ura4-D18 trt1::his3 ccq1-mCherry-GBP:hygMX6 pot1-GFP-kanMX6</i>                                                        | This study | JCF 13129 |
| <i>ade6-M210 his3-D1 leu1-32 ura4-D18 trt1::his3 Reb1-GFP:natMX6 Hht1-RFP:kanMX6 dcr1::hygMX6</i>                                                   | This study | JCF 13132 |
| <i>ade6-M210/ade6-M216 his3-D1/his3-D1 leu1-32/leu1-32 ura4-D18/ura4-D18 pot1+/pot1-GFP-kanMX6 ccq1+/ccq1-mCherry-GBP:hygMX6 poz1+/poz1::natMX6</i> | This study | JCF 13133 |
| <i>ade6-M210 his3-D1 leu1-32 ura4-D18 Reb1+/Reb1-GFP:natMX6 Hht1+/Hht1-RFP:kanMX6 dcr1+/dcr1::hygMX6 ccq1+/ccq1-mCherry-GBP:hygMX6</i>              | This study | JCF 13138 |
| <i>ade6-M210 his3-D1 leu1-32 ura4-D18 trt1::his3 ccq1-mCherry-GBP:hygMX6 pot1-GFP-kanMX6 poz1::natMX6</i>                                           | This study | JCF 13140 |

|                                                                                                                                   |            |           |
|-----------------------------------------------------------------------------------------------------------------------------------|------------|-----------|
| <i>ade6-M210 his3-D1 leu1-32 ura4-D18 pot1-GFP-kanMX ccq1-mCherry-GBP:hygMX6 poz1::natMX6</i>                                     | This study | JCF 13143 |
| <i>ade6-M210 his3-D1 leu1-32 ura4-D18 trt1::his3 Reb1-GFP:natMX6 ccq1-mCherry-GBP:hygMX6</i>                                      | This study | JCF 13145 |
| <i>ade6-? his3-D1 leu1-32 ura4-D18 Reb1-GFP:natMX6 ccq1-mCherry-GBP:hygMX6</i>                                                    | This study | JCF 13148 |
| <i>ade6-M210 his3-D1 leu1-32 ura4-D18 trt1::his3 Reb1-GFP:natMX6 ccq1-mCherry-GBP:hygMX6 clr3::kanMX6</i>                         | This study | JCF 13152 |
| <i>ade6-? his3-D1 leu1-32 ura4-D18 Reb1-GFP:natMX6 ccq1-mCherry-GBP:hygMX6 dcr1::kanMX6</i>                                       | This study | JCF 13154 |
| <i>ade6-M210 his3-D1 leu1-32 ura4-D18 trt1::his3 Reb1-GFP:natMX6 clr3::kanMX6</i>                                                 | This study | JCF 13156 |
| <i>ade6-M210 his3-D1 leu1-32 ura4-D18 trt1::his3 Reb1-GFP:natMX6 ccq1-mCherry-GBP:hygMX6 clr3::kanMX6</i>                         | This study | JCF 13157 |
| <i>ade6-M210 his3-D1 leu1-32 ura4-D18 trt1::his3 Reb1-GFP:natMX6</i>                                                              | This study | JCF 13172 |
| <i>ade6-M210/ade6-M216 his3-D1/his3-D1 leu1-32/leu1-32 ura4-D18/ura4-D18 reb1/reb1-GFP:natMX6 ccq1/ccq1-mCherry-GBP:hygMX6</i>    | This study | JCF 13183 |
| <i>trt1::his3 swi6-GFP-kanMX hht1-RFP-hygMX dcr1::natMX6</i>                                                                      | This study | JCF 13184 |
| <i>trt1::his3 swi6-GFP-kanMX hht1-RFP-hygMX clr3::natMX6</i>                                                                      | This study | JCF 13189 |
| <i>ade6-M210/ade6-M216 leu1-32/leu1-32 ura4-D18/ura4-D18 reb1/reb1-GFP:natMX6 ccq1/ccq1-mCherry-GBP:hygMX6 trt1::his3/his3-D1</i> | This study | JCF 13191 |
| <i>swi6-GFP-kanMX hht1-RFP-hygMX dcr1::natMX6</i>                                                                                 | This study | JCF 13193 |
| <i>swi6-GFP-kanMX hht1-RFP-hygMX clr3::natMX6</i>                                                                                 | This study | JCF 13195 |
| <i>h- ade6-M210 his3-D1 leu1-32 ura4-D18 swi6-GFP-KanMx reb1-TdTomato-NatMX</i>                                                   | This study | JCF 17656 |
| <i>h- ade6-M210 his3-D1 leu1-32 ura4-D18 swi6-GFP-KanMx reb1-TdTomato-NatMX</i>                                                   | This study | JCF 17657 |
| <i>ade6-M210 his3-D1 leu1-32 ura4-D18 trt1::his3 swi6-GFP-KanMx reb1-TdTomato-NatMX</i>                                           | This study | JCF 17658 |
| <i>ade6-M210 his3-D1 leu1-32 ura4-D18 trt1::his3 swi6-GFP-KanMx reb1-TdTomato-NatMX</i>                                           | This study | JCF 17659 |
| <i>ade6-M210 his3-D1 leu1-32 ura4-D18 trt1::his3 dcr1::HygMx swi6-GFP-KanMx reb1-TdTomato-NatMX</i>                               | This study | JCF 17678 |
| <i>ade6-M210 his3-D1 leu1-32 ura4-D18 trt1::his3 dcr1::HygMx swi6-GFP-KanMx reb1-TdTomato-NatMX</i>                               | This study | JCF 17679 |
| <i>ade6-M210 his3-D1 leu1-32 ura4-D18 trt1::His3 clr3::NatMX swi6-GFP-KanMx</i>                                                   | This study | JCF 17970 |
| <i>ade6-M210 his3-D1 leu1-32 ura4-D18 trt1::His3 clr3::NatMX Swi6-GFP-KanMx</i>                                                   | This study | JCF 17971 |
| <i>taz1-mCherry-natR leu1-32 ura4-D18</i>                                                                                         | This study | JCF 2498  |

|                                                        |                   |          |
|--------------------------------------------------------|-------------------|----------|
| <i>ade6-M210 his3-D1 leu1-32 ura4-D18</i>              | Jain et al., 2010 | JCF 108  |
| <i>ade6-M210 his3-D1 leu1-32 ura4-D18 trt1::his3</i>   | Jain et al., 2010 | JCF 8524 |
| <i>trt1::his3 leu1-32 his3-D1 ura4-D18 ade6-M210</i>   | Jain et al., 2010 | JCF 909  |
| <i>ade6-M210 his3-D1 leu1-32 ura4-D18 trt1::his3</i>   | Jain et al., 2010 | JCF 8525 |
| <i>trt1::his3 ura4+</i>                                | Jain et al., 2010 | JCF 8500 |
| <i>ade6-M210 his3-D1 leu1-32 ura4-D18 trt1::hygMX6</i> | Jain et al., 2010 | JCF 8546 |

### **Supplemental Table S1.**

List of strains used in this study.

**Table S2**

| <b>Oligonucleotides</b>                                                                                                           | <b>Source</b>                | <b>IDENTIFIER</b> |
|-----------------------------------------------------------------------------------------------------------------------------------|------------------------------|-------------------|
| Probe I: PCR product of primers (5' to 3')<br>caatcatctttccatgaaccggc and<br>cctattacaataacttctcaatcgg                            | Ferreira and<br>Cooper, 2001 | N/A               |
| Probe L: PCR product of primers (5' to 3')<br>gccacataaaaagtgcgattggcgg and<br>ggaactgaccgttatagcctccac                           | Ferreira and<br>Cooper, 2001 | N/A               |
| Probe M: PCR product of primers (5' to 3')<br>cgacttcatgtttacttccaagcc and<br>ggaaagtgtgacaatgtcagtgctg                           | Ferreira and<br>Cooper, 2001 | N/A               |
| Probe C: PCR product of primers (5' to 3')<br>ccataaaagtagcagccagatcccc and<br>cctctgtaggtggattgactagg                            | Ferreira and<br>Cooper, 2001 | N/A               |
| Probe STE1: Apal digestion fragment from<br>pNSU70                                                                                | Nakamura et al.,<br>1998     | N/A               |
| Probe STE2: Nsil digestion fragment from pNSU70                                                                                   | Nakamura et al.,<br>1998     | N/A               |
| Probe STE3: EcoRV-HindIII digestion fragment<br>from pNSU70                                                                       | Nakamura et al.,<br>1998     | N/A               |
| Probe rDNA: HindIII fragment from Yip10.4                                                                                         | Toda et al., 1984            | N/A               |
| Probe ACT1: PCR product of act1 gene<br>(AGAAGAAATCGCAGCGTTGG +<br>ACGGTAAACGATACCAGGTC)                                          | This study                   | N/A               |
| Probe TELO: 450bp synthetic telomeric<br>oligonucleotide probe, made of ligated<br>oligonucleotides of 49bp of telomeric sequence | Miller et al., 2006          | N/A               |
| 18s qPCR: oligos 18s C-F<br>(ACTTTGAGCCTGGTCGACTG) + 18s C-R<br>(CATTACGGCGGTCCTAGAAA)                                            | This study                   | N/A               |
| SubTELO qPCR: oligos BAM 136<br>(GTGTGGAATTGAGTATGGTGAA) + STE1 CF<br>(GGGGGCATTGTATTTGTGAA)                                      | This study                   | N/A               |
| Dg/dh qPCR: oligos DG-RT1<br>(CCGAATCAACAGGCCATAGT) + DG-RT2<br>(TGTTGTTGCTTTCACATTTGC)                                           | This study                   | N/A               |

**Supplemental Table S2.**

List of oligonucleotides and probes used in this study.

**Table S3**

| REAGENT                                 | SOURCE                          | IDENTIFIER      |
|-----------------------------------------|---------------------------------|-----------------|
| Mouse anti-V5 tag antibody              | Serotec                         |                 |
| Trichostatin A (TSA)                    | Sigma-Aldrich                   | Cat#58880-19-6  |
| Methyl methanesulfonate (MMS)           | Sigma-Aldrich                   | Cat#66-27-3     |
| 5-Fluoroorotic Acid (FOA)               | US biological,<br>Thermo Fisher | Cat#207291-8-4  |
| nourseothricin dihydrogen sulfate (NAT) | Fisher                          | Cat#5029426     |
| G418 sulfate (Geneticin)                | Invitrogen/Life<br>Technologies | Cat#10131027    |
| Hygromycin                              | Sigma-Aldrich                   | Cat#H7772       |
| Pan mouse IgG-coated magnetic Dynabeads | ThermoFisher                    | Cat#11041       |
| Proteinase K                            | Sigma-Aldrich                   | Cat#39450-01-6  |
| RNase A                                 | Roche                           | Cat#10109169001 |
| Zymolyase-100T                          | Ambio                           | Cat#120493-1    |
| MyTaq HS DNA polymerase                 | Bioline                         | Cat#BIO-21111   |
| Expand™ High Fidelity PCR System        | Roche                           | Cat#EHIFI-RO    |
| Random prime labelling kit              | Stratagene                      | Cat#600069      |
| Phenylmethylsulfonyl fluoride (PMSF)    | Sigma-Aldrich                   | Cat#P7626       |
| NotI                                    | NEB                             | Cat#R3189S      |
| Apal                                    | NEB                             | Cat#R0114L      |
| HindIII                                 | NEB                             | Cat#R3104L      |
| EcoRV                                   | NEB                             | Cat#R3195L      |
| NsiI                                    | NEB                             | Cat#R3127L      |
| QIAquick PCR Purification Quick         | Qiagen                          | Cat#28104       |
| QIAquick Gel Extraction Kit             | Qiagen                          | Cat#28704       |
| TruSeq Nano DNA Library Prep Kit        | Illumina                        | Cat#FC-121-4001 |

**Supplemental Table S3.**

List of reagents used in this study.



**Table S4**

| <b>Software and Algorithms</b>   |                   |                                                                                                                                                                                                                   |
|----------------------------------|-------------------|-------------------------------------------------------------------------------------------------------------------------------------------------------------------------------------------------------------------|
| Prism GraphPad 7.0               | Graphing software | N/A                                                                                                                                                                                                               |
| SoftWoRX 6.0                     | GE Healthcare     | <a href="http://www.gelifesciences.com/webapp/wcs/stores/servlet/productById/en/GELifeSciences-us/29065728">http://www.gelifesciences.com/webapp/wcs/stores/servlet/productById/en/GELifeSciences-us/29065728</a> |
| BLAST sequence alignment program | NCBI              | N/A                                                                                                                                                                                                               |
| picard-tools MarkDuplicates      | Picard tools      | <a href="http://broadinstitute.github.io/picard">http://broadinstitute.github.io/picard</a>                                                                                                                       |

**Supplemental Table S4.**

List of software and algorithms used in this study.
